# Supplementary material
Source: publisher figshare collection journal article supplement (https://diabetesjournals.figshare.com/ndownloader/files/27557570)
Supplement: Supplementary file 1 [file 27557570]

## Sheet: Sheet1
Table S1
	Annotation
Biotype	Gencode V19		FANTOM 5	Total
Protein-coding	22141	+	910	23051
lncRNA	1366	+	565	1931
ncRNA	370	+	61	431
other	219	+	708	927
non-annotated				2849
